# Supplementary material for: How Owners of Epileptic Dogs Living in Italy Evaluate Their Quality of Life and That of Their Pet: A Survey Study
Source: MDPI journal article supplement (doi:10.3390/vetsci8080140), 2021-07-23
Supplement: s1 [file s1]

**Supplementary Table S1.** Number and percentage of answers obtained for questionnaire questions 10-49, total and median score values for each question.

|                                                                               | Not at all<br>(score: 1) | A little<br>(score: 2) | Enough<br>(score: 3) | A lot<br>(score: 4) | Completely<br>(score: 5) | Total<br>score | Median<br>score |
|-------------------------------------------------------------------------------|--------------------------|------------------------|----------------------|---------------------|--------------------------|----------------|-----------------|
| Pet-owner relationship                                                        |                          |                        |                      |                     |                          |                |                 |
| 10. Do you consider your dog like a child?                                    | 6<br>(7.5%)              | 12<br>(15%)            | 32<br>(40%)          | 21<br>(26.25%)      | 9<br>(11.25%)            | 255            | 3               |
| 11. Do you think your dog understands your mood and your problems?            | 5<br>(6.25%)             | 12<br>(15%)            | 24<br>(30%)          | 23<br>(28.75%)      | 16<br>(20%)              | 273            | 3               |
| 12. Do you feel closer to your dog than to your friends or family members?    | 6<br>(7.5%)              | 16<br>(20%)            | 30<br>(37.5%)        | 22<br>(27.5%)       | 6<br>(7.5%)              | 246            | 3               |
| Expectations on antiepileptic treatment                                       |                          |                        |                      |                     |                          |                |                 |
| When you started treatment                                                    |                          |                        |                      |                     |                          |                |                 |
| 13. Were you optimist about the possibility of improving the dog's QoL?       | 4<br>(5%)                | 14<br>(17.5%)          | 28<br>(35%)          | 26<br>(32.5%)       | 8<br>(10%)               | 260            | 3               |
| 14. Did you think it would involve more effort?                               | 17<br>(21.25%)           | 16<br>(20%)            | 19<br>(23.75%)       | 20<br>(25%)         | 8<br>(10%)               | 226            | 3               |
| Assessment of seizures control and emotional impact on the owner              |                          |                        |                      |                     |                          |                |                 |
| 15. Has the frequency of seizures been acceptable in the last 3 months?       | 10<br>(12.5%)            | 11<br>(13.75%)         | 28<br>(35%)          | 13<br>(16.25%)      | 18<br>(22.5%)            | 210            | 3               |
| 16. How worried are you about the frequency of seizures?                      | 0<br>(0%)                | 2<br>(2.5%)            | 11<br>(13.75%)       | 44<br>(55%)         | 23<br>(28.75%)           | 328            | 4               |
| 17. Has the severity of seizures been acceptable in the last 3 months?        | 6<br>(7.5%)              | 14<br>(17.5%)          | 26<br>(32.5%)        | 17<br>(21.25%)      | 17<br>(21.25%)           | 265            | 3               |
| 18. How worried are you about the severity of seizures?                       | 1<br>(1.25%)             | 4<br>(5%)              | 13<br>(16.25%)       | 39<br>(48.75%)      | 23<br>(28.75%)           | 319            | 4               |
| 19. Overall, has the seizure management been successful in last three months? | 4<br>(5%)                | 12<br>(15%)            | 27<br>(33.75%)       | 13<br>(16.25%)      | 24<br>(30%)              | 281            | 3               |
| AED side effects                                                              |                          |                        |                      |                     |                          |                |                 |
| How severe have the following side effects been in the last 3 months?         |                          |                        |                      |                     |                          |                |                 |
| 20. Eating increase                                                           | 17<br>(21.25%)           | 20<br>(25%)            | 22<br>(27.5%)        | 18<br>(22.5%)       | 3<br>(3.75%)             | 210            | 3               |
| 21. Gaining weight                                                            | 26<br>(32.5%)            | 34<br>(42.5%)          | 13<br>(16.25%)       | 5<br>(6.25%)        | 2<br>(2.5%)              | 163            | 2               |
| 22. Drinking increase                                                         | 17<br>(21.25%)           | 24<br>(30%)            | 25<br>(31.25%)       | 10<br>(12.5%)       | 4<br>(5%)                | 200            | 2               |
| 23. Urinating increase                                                        | 14<br>(17.5%)            | 27<br>(33.75%)         | 18<br>(22.5%)        | 17<br>(21.25%)      | 4<br>(5%)                | 210            | 2               |
| 24. Sleeping increase                                                         | 17<br>(21.25%)           | 35<br>(43.75%)         | 19<br>(23.75%)       | 8<br>(10%)          | 1<br>(1.25%)             | 181            | 2               |
| 25. Depression                                                                | 31<br>(38.75%)           | 32<br>(40%)            | 14<br>(17.5%)        | 3<br>(3.75%)        | 0<br>(0%)                | 149            | 2               |
| 26. Restlessness                                                              | 23<br>(28.75%)           | 33<br>(41.25%)         | 14<br>(17.5%)        | 6<br>(7.5%)         | 4<br>(5%)                | 175            | 2               |
| 27. Not coordination when walking                                             | 36<br>(45%)              | 29<br>(36.25%)         | 9<br>(11.25%)        | 6<br>(7.5%)         | 0<br>(0%)                | 145            | 2               |
| 28. Itchiness or skin rash                                                    | 49<br>(61.25%)           | 21<br>(26.25%)         | 5<br>(6.25%)         | 5<br>(6.25%)        | 0<br>(0%)                | 126            | 1               |
| 29. Vomiting                                                                  | 68<br>(85%)              | 10<br>(12.5%)          | 2<br>(2.5%)          | 0<br>(0%)           | 0<br>(0%)                | 94             | 1               |
| 30. Diarrhea                                                                  | 61<br>(76.25%)           | 17<br>(21.25%)         | 2<br>(2.5%)          | 0<br>(0%)           | 0<br>(0%)                | 101            | 1               |

|                                                                                                                                                                                                               |                |                |                |                |                |     |     |
|---------------------------------------------------------------------------------------------------------------------------------------------------------------------------------------------------------------|----------------|----------------|----------------|----------------|----------------|-----|-----|
| Assessment of AED side effects and emotional impact on the owner                                                                                                                                              |                |                |                |                |                |     |     |
| 31. Overall, have the side effects of the therapy been acceptable in the last 3 months?                                                                                                                       | 0<br>(0%)      | 7<br>(8.75%)   | 32<br>(40%)    | 22<br>(27.5%)  | 19<br>(23.75%) | 293 | 4   |
| 32. How bothersome are the physical effects of the therapy (eating increase, gaining weight, drinking increase, urinating increase, not coordination when walking, itchiness, skin rash, vomiting, diarrhea)? | 24<br>(30%)    | 29<br>(36.25%) | 17<br>(21.25%) | 8<br>(10%)     | 2<br>(2.5%)    | 175 | 2   |
| 33. How bothersome was the mental effects of the therapy (sleeping increase, depression, restlessness)?                                                                                                       | 27<br>(33.75%) | 28<br>(35%)    | 17<br>(21.25%) | 5<br>(6.25%)   | 3<br>(3.75%)   | 169 | 2   |
| 34. How worrying are the physical effects of therapy?                                                                                                                                                         | 18<br>(22.5%)  | 27<br>(33.75%) | 21<br>(26.25%) | 12<br>(15%)    | 2<br>(2.5%)    | 193 | 2   |
| 35. How worrying are the mental effects of therapy?                                                                                                                                                           | 26<br>(32.5%)  | 29<br>(36.25%) | 14<br>(17.5%)  | 9<br>(11.25%)  | 2<br>(2.5%)    | 172 | 2   |
| Restrictions on the owner's life                                                                                                                                                                              |                |                |                |                |                |     |     |
| 36. In the past 3 months has your dog's epilepsy caused conflict with your work, education or day-to-day activities?                                                                                          | 24<br>(30%)    | 22<br>(27.5%)  | 18<br>(22.5%)  | 10<br>(12.5%)  | 6<br>(7.5%)    | 192 | 2   |
| 37. In the past 3 months has your dog's epilepsy limited your social life?                                                                                                                                    | 32<br>(40%)    | 21<br>(26.25%) | 8<br>(10%)     | 14<br>(17.5%)  | 5<br>(6.25%)   | 179 | 2   |
| 38. In the past 3 months has your dog's epilepsy limited your free time?                                                                                                                                      | 32<br>(40%)    | 17<br>(21.25%) | 9<br>(11.25%)  | 15<br>(18.75%) | 7<br>(8.75%)   | 188 | 2   |
| 39. In the past 3 months has your dog's epilepsy limited your independence?                                                                                                                                   | 26<br>(32.5%)  | 25<br>(31.25%) | 6<br>(7.5%)    | 17<br>(21.25%) | 6<br>(7.5%)    | 192 | 2   |
| Emotional impact of rectal diazepam use for emergency management of seizures at home                                                                                                                          |                |                |                |                |                |     |     |
| 40. Are you worried when you need to give rectal dizepam?                                                                                                                                                     | 27<br>(33.75%) | 18<br>(22.5%)  | 19<br>(23.75%) | 9<br>(11.25%)  | 7<br>(8.75%)   | 191 | 2   |
| <b>Ideals in outcome assessment of seizure management</b>                                                                                                                                                     |                |                |                |                |                |     |     |
| How important are the following factors to you when assessing the outcome of seizure management?                                                                                                              |                |                |                |                |                |     |     |
| 41. Seizure frequency                                                                                                                                                                                         | 2<br>(2.5%)    | 3<br>(3.75%)   | 11<br>(13.75%) | 39<br>(48.75%) | 25<br>(31.25%) | 322 | 4   |
| 42. Seizure severity                                                                                                                                                                                          | 2<br>(2.5%)    | 3<br>(3.75%)   | 14<br>(17.5%)  | 35<br>(43.75%) | 26<br>(32.5%)  | 320 | 4   |
| 43. AED side effects                                                                                                                                                                                          | 6<br>(7.5%)    | 13<br>(16.25%) | 24<br>(30%)    | 32<br>(40%)    | 5<br>(6.25%)   | 257 | 3   |
| 44. Dog's QoL                                                                                                                                                                                                 | 1<br>(1.25%)   | 3<br>(3.75%)   | 7<br>(8.75%)   | 32<br>(40%)    | 37<br>(46.25%) | 341 | 4   |
| 45. Influence on your lifestyle                                                                                                                                                                               | 7<br>(8.75%)   | 21<br>(26.25%) | 23<br>(28.75%) | 23<br>(28.75%) | 6<br>(7.5%)    | 240 | 3   |
| 46. Cost of the seizure management (drugs, diagnostic procedures, monitoring)                                                                                                                                 | 11<br>(13.75%) | 25<br>(31.25%) | 20<br>(25%)    | 18<br>(22.5%)  | 6<br>(7.5%)    | 223 | 3   |
| Impact of caring for the epileptic dog on the owner's lifestyle                                                                                                                                               |                |                |                |                |                |     |     |
| 47. Is the administration of the medication a nuisance?                                                                                                                                                       | 40<br>(50%)    | 24<br>(30%)    | 12<br>(15%)    | 3<br>(3.75%)   | 1<br>(1.25%)   | 141 | 1,5 |
| 48. Are veterinary checks a nuisance?                                                                                                                                                                         | 33<br>(41.25%) | 31<br>(38.75%) | 13<br>(16.25%) | 2<br>(2.5%)    | 1<br>(1.25%)   | 147 | 2   |

|                                     |               |               |               |                |                |     |   |
|-------------------------------------|---------------|---------------|---------------|----------------|----------------|-----|---|
| 49. Is seizure event is a nuisance? | 9<br>(11.25%) | 9<br>(11.25%) | 10<br>(12.5%) | 27<br>(33.75%) | 25<br>(31.25%) | 290 | 4 |
|-------------------------------------|---------------|---------------|---------------|----------------|----------------|-----|---|
